# Supplementary material
Source: PubMed Central journal article supplement (PMC3252566)
Supplement: emboj2011341s1.pdf [file emboj2011341s1.pdf]

Supplemental Table 1. **Potential DST *cis*-element containing transcripts and their regulation in response to Fe.** AGI number of the transcripts, which contain DST-like *cis*- element in their 3'-UTR, are categorized according to their genetic location. Transcripts regulated by Fe in *Arabidopsis* cells are highlighted in grey.

Supplemental Table 2. **Oligonucleotides used for plasmid construction and quantitative qRT-PCR.** Bases in *italic* show the restriction site incorporated for cloning.

Supplemental Figure 1. ***AtSAUR-AC1* mRNA accumulation and half-life in response to iron treatment.** (A) *Arabidopsis* green cells were collected before (0) and 3 h after treatment with 300  $\mu$ M Fe-citrate. Total RNA was extracted and *AtSAUR-AC1* mRNA abundance was determined as described in Figure 1. (B) Determination of *AtSAUR-AC1* relative half-life. Cordycepin was added at each time point mentioned above, and samples were recovered every 30 minutes for 2 hours. *AtSAUR-AC1* mRNA relative half-life was determined as described in the legend to Figure 1. Values and standard errors were obtained from 3 independent experiments.

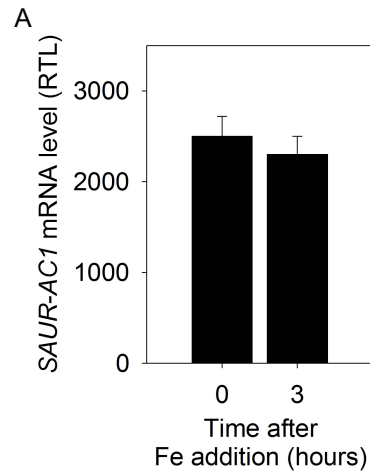

B

---

| <i>SAUR-AC1</i> mRNA half-life (min) |          |
|--------------------------------------|----------|
| control (0h)                         | 109 ± 04 |
| + Fe (3h)                            | 107 ± 03 |

---

**Supplemental Figure 1**
